# Supplementary material
Source: PubMed Central journal article supplement (PMC7467807)
Supplement: nn0c03050_si_001.pdf [file nn0c03050_si_001.pdf]

## Supporting Information

### Citrate Coordination and Bridging of Gold Nanoparticles: The Role of Gold Adatoms in AuNP Ageing

David-Benjamin Gryst<sup>†</sup>, Bart de Nijst<sup>†</sup>, Andrew R. Salmon<sup>†</sup>, Junyang Huang<sup>†</sup>, Wenting Wang<sup>†</sup>, Wei-Hsin Chen<sup>†</sup>, Oren A. Scherman<sup>‡</sup>, Jeremy J. Baumberg<sup>†\*</sup>

<sup>†</sup> NanoPhotonics Centre, Cavendish Laboratory, Department of Physics, JJ Thompson Avenue, University of Cambridge, Cambridge, CB3 0HE, UK

<sup>‡</sup> Melville Laboratory for Polymer Synthesis, Department of Chemistry, University of Cambridge, Lensfield Road, Cambridge CB2 1EW, UK

**Characterisation of stock AuNP suspension.** The AuNPs were synthesised according to the standard Turkevich/Frens protocol (see experimental section). To investigate the influence of cations on AuNP ‘ageing’, two batches of AuNPs based on trisodium citrate TSC or tripotassium citrate TPS were made. The UV-vis spectra (Figure S1a) and zeta size measurements (Figure S1c) suggest that the AuNP concentration, size and size distribution are near-identical.

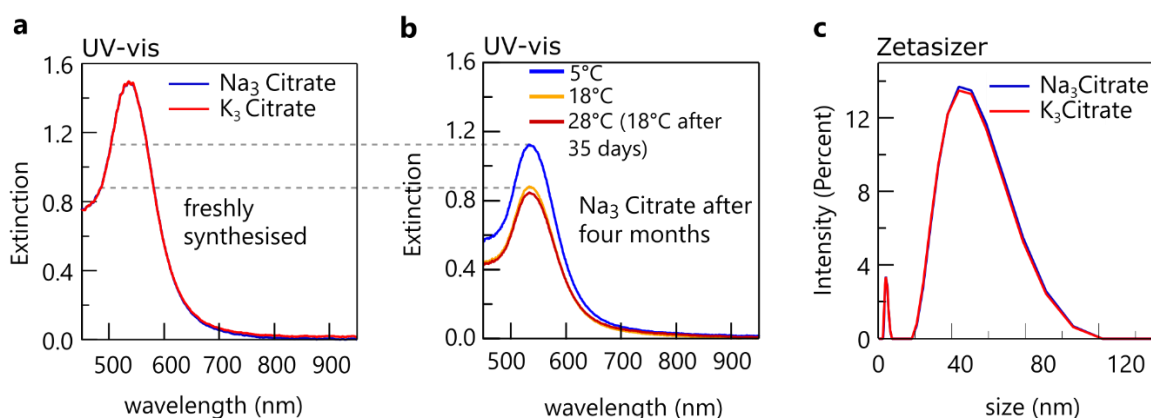

**Figure S1.** Characterisation of in-house AuNPs. (a) UV-vis spectra showing similar optical densities between trisodium and tripotassium citrate AuNPs. (b) UV-vis spectra showing optical densities after four months. (c) Zetasize measurements confirm that the K<sub>3</sub> and Na<sub>3</sub> have almost the same size and also size distribution.

Since the gold chloride to citrate ratio of 1:1.33 was the same for both batches, this also means that K<sup>+</sup> and Na<sup>+</sup> have no influence on the reaction kinetics. The hydrodynamic diameter is ~49.7 nm with a standard deviation of ~17.6 nm. The pH of the freshly synthesised AuNP suspension is 3.5±0.1 as a result of the citrate to HAuCl<sub>4</sub> ratio. The low pH is advantageous to keep citrate break-down products off the gold surfaces. With pK<sub>a</sub>=4.7<sup>1</sup>, acetate/acetic acid (the final by-product) will be fully protonated. Despite the low pH, the AuNPs are stable for months. Even after four months from the day of synthesis, no signs of aggregation are observed in the UV-vis spectra (Figure S1c). The decrease in optical densities is caused by AuNPs deposited on the inside walls of the centrifuge tubes used to store the AuNP suspensions. During the ageing experiments, no deposition was noticed on the walls of the containers.

**Ageing experiment for higher pH values and salted AuNPs.** The ageing experiment was repeated by “salting” the AuNPs with trisodium citrate (TSC) and sodium chloride (NaCl) instead of using CB[5] as the nano-spacer.

This is to rule out potential interference between CB[5] and citrate during the ageing process and to determine the coordination modes of citrate. The spectra of fresh and aged AuNPs contain peaks which are also present in the ageing experiments with CB[5] (Figure S2a,b). To observe and compare ageing at different protonation states of citrate, the pH values of the AuNP suspensions are adjusted to 3.8, 5.5 and 6.8 by adding citrate buffer (TSC/citric acid) with a final concentration of 5 mM.

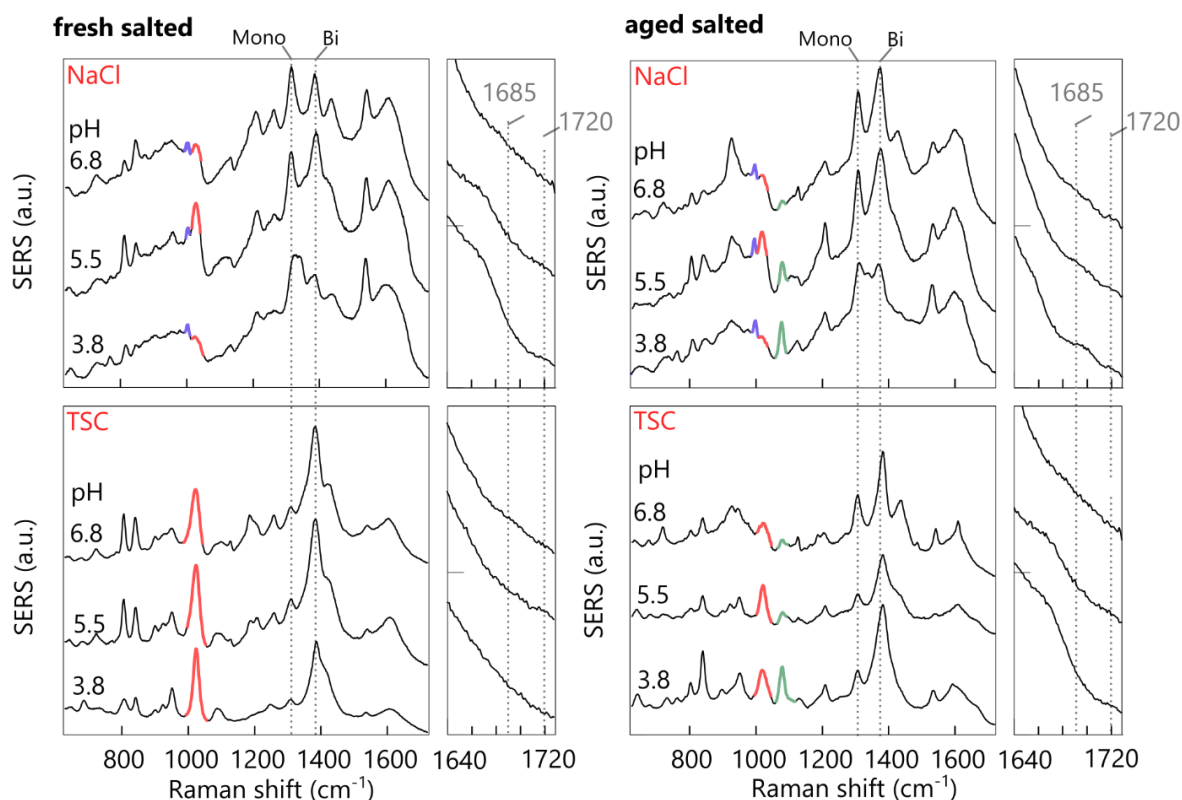

**Figure S2.** Salted (TSC and NaCl) AuNPs fresh vs aged for different pH. (a) aged and (b) salted.

For the NaCl-salted AuNPs, both fresh and aged, the 1300-1320  $\text{cm}^{-1}$  mode indicates monodentate binding of the terminal carboxylates possibly caused by chloride ions (see main text and Figure S13 for control measurements).

At pH=5.5, the  $c_2$  coordination mode (1020  $\text{cm}^{-1}$ ) is more pronounced than for the lower pH=3.8 where  $c_2$ - $t_2t_2$  (995  $\text{cm}^{-1}$ ) dominates. This can be explained by a lower citrate surface coverage at lower pH which allows citrate ions to span the nanogap. The surface coverage is presumably lower at pH=3.8 ( $\text{pK}_{a1}=3.13$ ) because significantly more fully protonated citrate ions exist compared to pH=5.5.

Aged NaCl AuNPs show a decrease of the adatom-driven  $c_2t_2$ - $t_2$  coordination with increasing pH. Conversely, a vibrational mode at 925  $\text{cm}^{-1}$  increases with increasing pH. This mode  $\nu(\text{CCOO}^-)$  of the uncoordinated central carboxylate exhibits a strong Raman activity and only occurs for  $t_2t_2$  coordination.

The TSC salted AuNPs (~60 mM TSC concentration) show fewer coordination modes; the fresh AuNPs are clearly dominated by  $c_2$  for all pH values. The two higher pH values contain some  $c_2$ - $t_2t_2$  modes as evident by the vibrations at 995 and 1535  $\text{cm}^{-1}$ .

1. Aged AuNPs exhibit the adatom-driven  $c_2t_2-t_2$ . At pH=6.8, there is some indication of  $t_2t_2$  with the emerging  $925\text{ cm}^{-1}$  mode. A summary of the citrate coordination modes can be found in Table **S1**.

| pH         | fresh NaCl-salted                                                                                                                                         | aged NaCl-salted                                                                                                                                                                                                                                      | fresh TSC-salted                                                      | aged TSC-salted                                                                                        |
|------------|-----------------------------------------------------------------------------------------------------------------------------------------------------------|-------------------------------------------------------------------------------------------------------------------------------------------------------------------------------------------------------------------------------------------------------|-----------------------------------------------------------------------|--------------------------------------------------------------------------------------------------------|
| <b>3.8</b> | C <sub>2</sub><br><b>C<sub>2</sub>-t<sub>2</sub>t<sub>2</sub></b><br>C <sub>2</sub> -t <sub>2</sub> t <sub>1</sub>                                        | C <sub>2</sub><br><b>C<sub>2</sub>t<sub>2</sub>-t<sub>2</sub></b><br>C <sub>2</sub> -t <sub>2</sub> t <sub>2</sub><br>C <sub>2</sub> -t <sub>2</sub> t <sub>1</sub><br>C <sub>2</sub> -t <sub>2</sub> t <sub>1</sub><br>t <sub>2</sub> t <sub>2</sub> | <b>C<sub>2</sub></b>                                                  | C <sub>2</sub><br><b>C<sub>2</sub>t<sub>2</sub>-t<sub>2</sub></b>                                      |
| <b>5.5</b> | <b>C<sub>2</sub></b><br>C <sub>2</sub> -t <sub>2</sub> t <sub>2</sub><br>C <sub>2</sub> -t <sub>2</sub> t <sub>1</sub>                                    | <b>C<sub>2</sub></b><br>C <sub>2</sub> t <sub>2</sub> -t <sub>2</sub><br>C <sub>2</sub> -t <sub>2</sub> t <sub>2</sub><br>C <sub>2</sub> -t <sub>2</sub> t <sub>1</sub><br>t <sub>2</sub> t <sub>2</sub>                                              | <b>C<sub>2</sub></b><br>C <sub>2</sub> -t <sub>2</sub> t <sub>2</sub> | <b>C<sub>2</sub></b><br>C <sub>2</sub> t <sub>2</sub> -t <sub>2</sub>                                  |
| <b>6.8</b> | <b>C<sub>2</sub></b><br><b>C<sub>2</sub>-t<sub>2</sub>t<sub>2</sub></b><br>C <sub>2</sub> -t <sub>2</sub> t <sub>1</sub><br>t <sub>2</sub> t <sub>2</sub> | C <sub>2</sub><br>C <sub>2</sub> t <sub>2</sub> -t <sub>2</sub><br>C <sub>2</sub> -t <sub>2</sub> t <sub>2</sub><br>C <sub>2</sub> -t <sub>2</sub> t <sub>1</sub><br><b>t<sub>2</sub>t<sub>2</sub></b>                                                | <b>C<sub>2</sub></b><br>C <sub>2</sub> -t <sub>2</sub> t <sub>2</sub> | <b>C<sub>2</sub></b><br>C <sub>2</sub> t <sub>2</sub> -t <sub>2</sub><br>t <sub>2</sub> t <sub>2</sub> |

**Table S1.** Extracted citrate coordination modes for salted AuNPs. The bold-face mode is the dominant mode within the pH value. For explanation of the nomenclature, please see section three of the main text.

**Arrhenius energy calculation.** The adatom-induced CC-stretch at  $1080\text{ cm}^{-1}$  observed in the CB[5]:AuNP ageing spectra (Figure **S3a**) with its linear increase over time is an excellent proxy to calculate the activation energy (Arrhenius energy) of the underlying gold adatom migration.

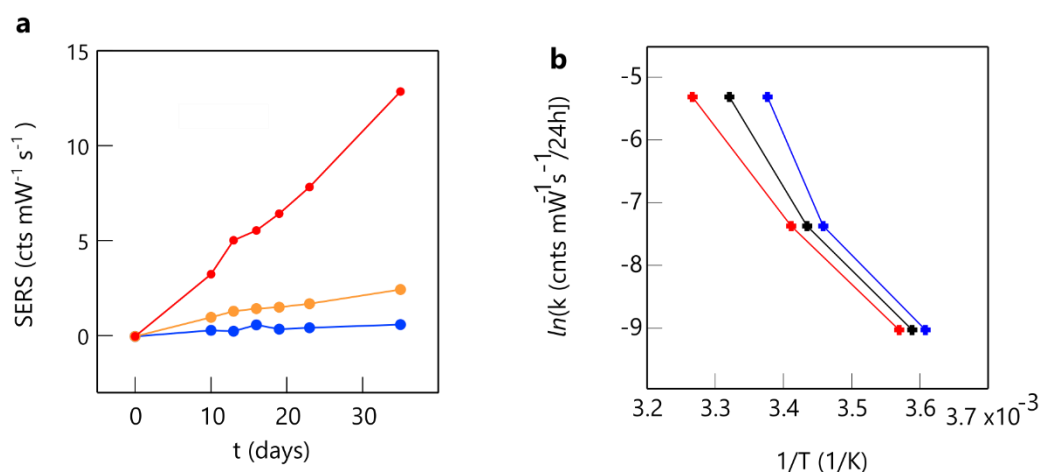

**Figure S3.** Activation energy of adatom mode. (a) Adatom proxy vibration for T=5, 18, 28 °C over time. (b) Extracted slopes from the peak. From the slope in (b) the activation energy can be directly extracted (see text).

For every temperature  $T$  the slope  $k$  of the CC-stretch must satisfy the equation

$$k_1 = A e^{-\frac{E_a}{k_B T}}$$

with  $k_B$  denoting the Boltzmann constant,  $A$  a reaction constant and  $E_a$  the activation energy. Taking the logarithm of the previous equation

$$\ln k = \ln A - \frac{E_a}{k_b} \frac{1}{T}$$

makes it possible to extract the activation energy directly from the slope  $m$  in the logarithmic plot in Figure **S5b** via

$$E_a = m k_B.$$

Accounting for the uncertainty in temperature of the samples, the calculation yields an activation energy  $E_a = 1.1 \pm 0.2$  eV = 26 kcal/mol.

**Repeatability of CB[5]:AuNP.** Aggregates mediated by CB[5] with a final concentration of 2.5  $\mu$ M produce highly repeatable SERS signals in terms of peak intensities and SERS background (Figure **S4a**). This is due to the precise 0.9 nm gap size defined by CB[5] and the fractal morphology of the clusters.

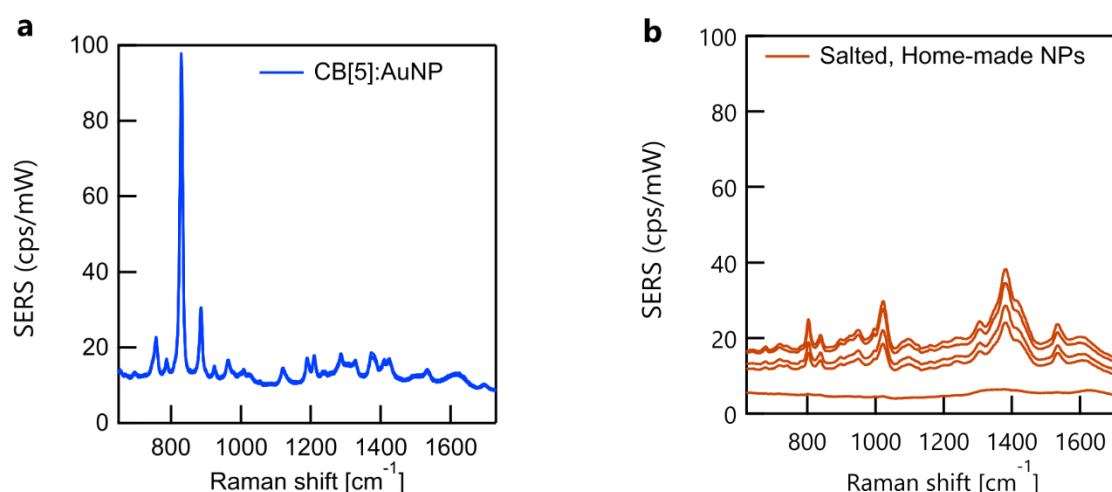

**Figure S4.** CB[5] vs salted AuNP aggregates. (a) Five slightly-aged CB[5]:AuNP samples showing high reproducibility (curves exactly superimpose). (b) Same nanoparticle stock suspension aggregated with TSC showing citrate signals and lower repeatability.

Spectra of TSC-salted aggregates of the same stock nanoparticle suspension (Figure **S4b**) are not reproducible, as evident by the varying SERS background and signal intensities. The final TSC concentration is  $\sim 60$  mM.

**Citrate coordination modes and DFT calculations.** Coordination of the carboxylates to the Au surface results in characteristic vibrational shifts and intensity changes of the COO<sup>-</sup> and CC stretches. This can be demonstrated by comparing the Raman response of aqueous TSC (1 M) (Figure **S5a**) to the signals of the dominant coordination mode  $c_2$  *i.e.* bidentate with the central carboxylate (Figure **S5b**).

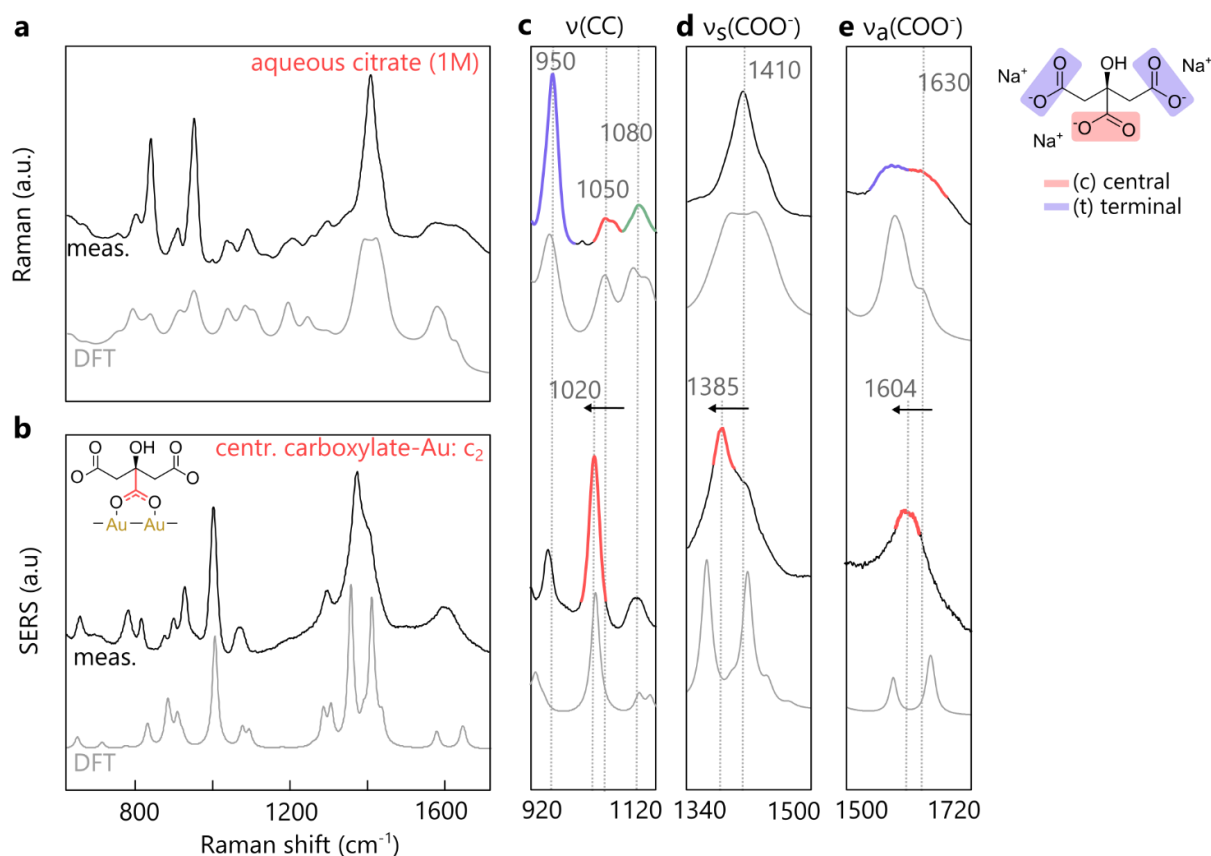

**Figure S5.** Aqueous vs adsorbed citrate. (a) Citrate chemical structure with its central (red) and terminal (blue) carboxylate. (b) Overview of carboxylate vibrations and characteristic vibrations bands depending on denticity and protonation stage, bound to Au and unbound. (c) Comparison between (top) Raman of 1M TSC versus SERS of TSC-salted AuNP aggregates (dominating citrate mode). (d) Carbon-carbon stretches and (e) asymmetric carboxylate stretch.

The symmetric stretch  $\nu_s(\text{COO}^-)$  of aqueous citrate (Figure S5c, top) is located at  $\sim 1410 \text{ cm}^{-1}$ . Upon bidentate coordination to two Au atoms ( $\mu_2$ ), it is blue-shifted (Figure S7c, bottom) to  $\sim 1385 \text{ cm}^{-1}$ . The  $\text{COO}^-$ -Au mode is not very useful for determining which of the three carboxylates are coordinated because of vibrational coupling between all three carboxylates. This makes it very difficult to disentangle each contribution. The  $\nu_s(\text{COO}^-)$  stretches are good markers to distinguish between bidentate bridging ( $\mu_2$ ) and monodentate coordination ( $1\kappa:\text{O}^1$ ) via a single oxygen.

The asymmetric carboxylate stretches  $\nu_a(\text{COO}^-)$  are much more suitable for distinguishing which carboxylate is bound. In aqueous citrate (Figure S5d, top), the  $\text{COO}^-$  stretches form a shoulder at  $\sim 1560$  to  $1630 \text{ cm}^{-1}$  with a clear separation (seen in DFT) between the central (blue) and terminal carboxylates (red). Upon bidentate coordination, the vibrations are blue-shifted by  $\sim 40 \text{ cm}^{-1}$ . Coordinated terminal carboxylates are translated to  $\sim 1530$ - $1550 \text{ cm}^{-1}$  and the central carboxylates (as in Figure S5b) to  $\sim 1560$ - $1610 \text{ cm}^{-1}$ . Intramolecular hydrogen bonding of the central OH-group to the bound carboxylate (as observed in DFT) has a strong influence on the position of the  $\text{COO}^-$ -Au stretch. This results in an even stronger blue-shift by an additional  $\sim 20 \text{ cm}^{-1}$ .

The carbon-carbon stretches  $\nu(\text{CC})$  of the CC bonds adjacent to the carboxylates (Figure S7e) exhibit very distinct shifts when their attached carboxylate coordinates to Au. The vibration of unbound terminal carboxylate is located at  $950 \text{ cm}^{-1}$  (blue), whereas the unbound central carboxylate (red) is located at  $1050 \text{ cm}^{-1}$ . Upon

coordination of a terminal carboxylate, the adjacent CC stretch is red-shifted to 960-985  $\text{cm}^{-1}$ . The central carboxylate (Figure S5e) CC-stretch is blue-shifted to  $\sim 1020 \text{ cm}^{-1}$  (strong red peak).

There are seven possible coordination modes that citrate can reach when trapped inside a nanogap (Figure S6a) (excluding the hexadentate mode with all three carboxylates bound to the same facet, which we find from DFT is not possible to flat Au). The distinct positions of their CC-stretches in combination with the asymmetric  $\text{COO}^-$ -stretches are sufficient to distinguish these modes in a SERS spectrum.

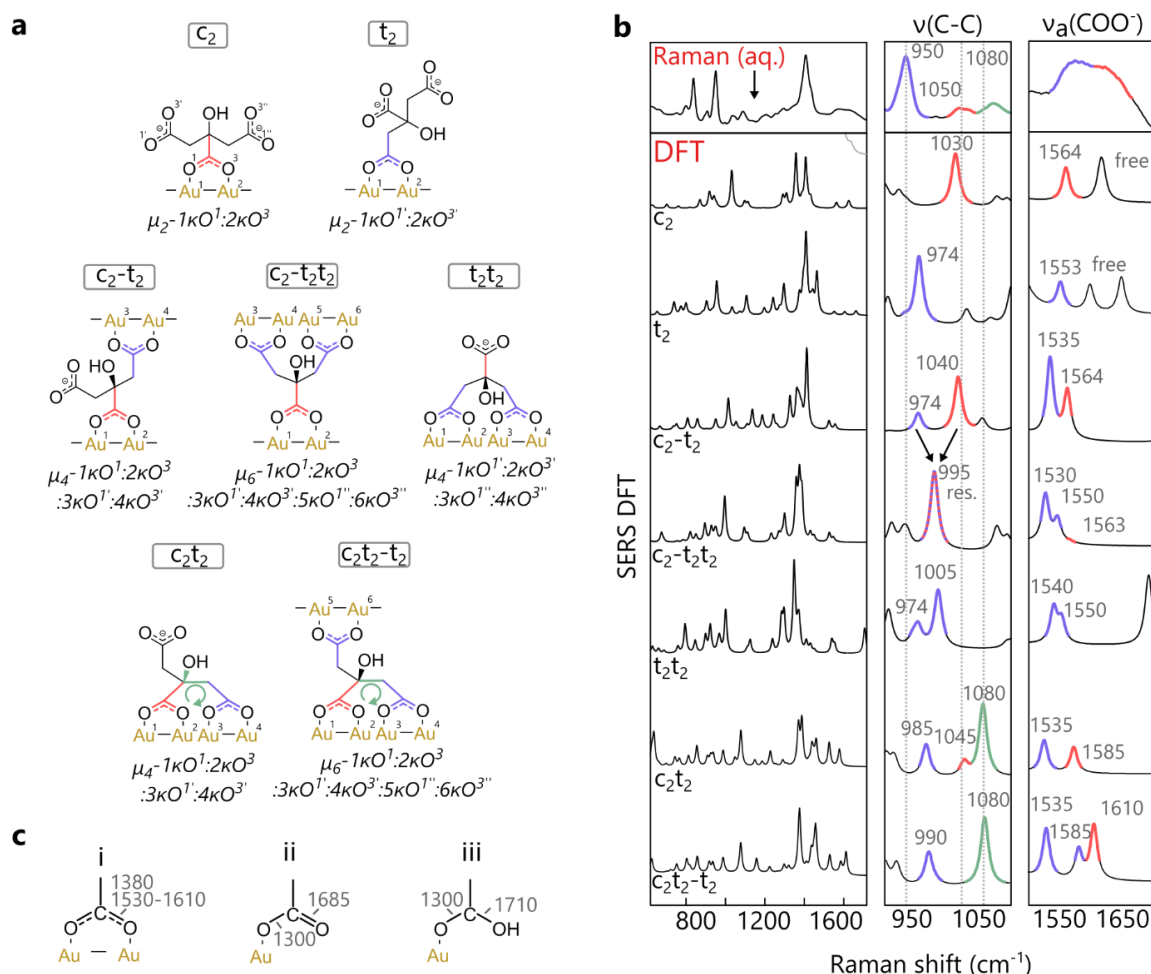

**Figure S6.** DFT calculations. (a) Citrate chemical structure with its central (red) and terminal (blue) carboxylate. (b) Overview of carboxylate vibrations and characteristic vibrations bands depending on denticity and protonation stage, bound to Au and unbound. (c) Comparison between (top) Raman of 1M TSC versus SERS of TSC-salted AuNP aggregates (dominating citrate mode). (c) Carboxylate stretches for (i) bidentate, (ii) monodentate, and (iii) monodentate (protonated carboxylate).

Compared to aqueous citrate, bidentate coordination of a terminal group ( $t_2$ ) results in the red-shift of the adjacent CC stretch from  $\sim 750 \text{ cm}^{-1}$  to  $775 \text{ cm}^{-1}$ . For the central group, the C-C stretch is blue-shifted from  $1050 \text{ cm}^{-1}$  to  $1020 \text{ cm}^{-1}$  ( $1030 \text{ cm}^{-1}$  DFT).

For citrate modes with structural symmetries the central and terminal CC-stretches are coupled and can coincide to form a single vibration. This occurs in  $c_2-t_2t_2$  (strong) and  $c_2t_2-t_2$  (weak) resulting in a joint vibration at  $990-995 \text{ cm}^{-1}$ . This is also the case

for  $t_2t_2$  where coupling between the two terminal groups with the unbound central carboxylate lead to a mode which is expected at  $\sim 1005\text{ cm}^{-1}$  (weak).

To distinguish between the triple bidentate modes  $c_2-t_2t_2$  and  $c_2t_2-t_2$ , the CC-stretch at  $1080\text{ cm}^{-1}$  (green) can be used. This mode becomes very active only if a terminal and the central carboxylate are bound on the same Au-facet. In measurements this mode is only observed when the terminal carboxylate coordinates to an adatom.

Apart from bidentate coordination (Figure S6c, i) the terminal carboxylates are also found as monodentate (ii) and monodentate protonated (iii):

- monodentate, unprotonated: the carboxylate binds with only one oxygen to a single gold atom. This leads to  $\nu(\text{CO}) \sim 1300\text{ cm}^{-1}$  and  $\nu(\text{C=O}) \sim 1685\text{ cm}^{-1}$ ,
- monodentate protonated: This leads to  $\nu(\text{CO}) \sim 1300\text{ cm}^{-1}$  and  $\nu(\text{C-OH}) \sim 1710\text{ cm}^{-1}$ .

As mentioned above, the central hydroxide (-OH) group of citrate prefers hydrogen-bonding to a carboxylate oxygen (intra-molecular H-bond). This affects the peak positions of the asymmetric carboxylate vibrations. The characteristic -OH...OOC bending mode is located at  $1515\text{ cm}^{-1}$  in both measurement and DFT calculation, but only very weakly Raman active. Binding of the hydroxide group to gold (with or without cleavage of the hydrogen) is possible, but no stable geometry could be found using DFT calculations. If binding occurred *via* the -OH group, the C-OH stretching vibration (also weakly Raman active) located at  $1140\text{ cm}^{-1}$  would undergo a shift and become much more Raman active, as is the case for the C-O-Au stretches of the carboxylate in monodentate binding.

**Influence of cations ( $\text{K}^+$ ,  $\text{Na}^+$ ) on ageing.** Concurrently to ageing experiments performed with TSC AuNPs, the same ageing protocol was applied to a batch of tripotassium citrate (TPS) AuNPs. The emerging peaks in the spectra (Figure S7, a-c) are identical for both cations. This suggests that the influence of cations on ageing and citrate coordination is negligible.

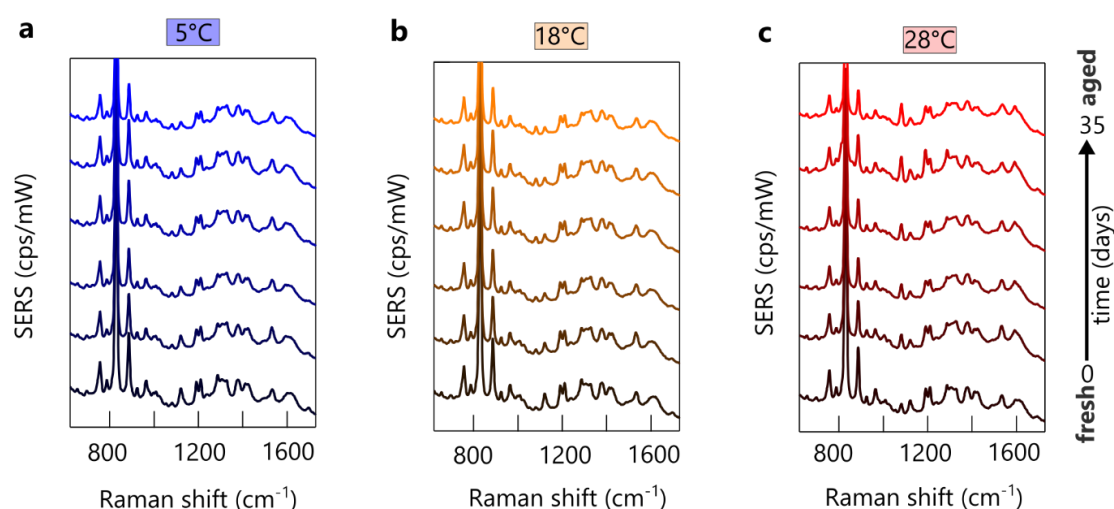

**Figure S7.** Ageing with  $\text{K}_3\text{Citrate}$  AuNPs. Spectra of ageing experiment for homemade TPS AuNPs stored at (a)  $5\text{ }^\circ\text{C}$ , (b)  $18\text{ }^\circ\text{C}$ , and (c)  $28\text{ }^\circ\text{C}$ .

**Citrate decomposition products.** Besides citrate, the supernatant of the AuNP suspension also contains reaction by-products (from the NP synthesis) and their thermal decomposition products. The typical decomposition pathway is: citrate, 1,3-acetone-dicarboxylate (ADC), acetoacetate (AA), and finally acetate/acetone. The unstable reaction by-products AA and ADC (both as acids and salts) undergo rapid decarboxylation during the reaction (100 °C).

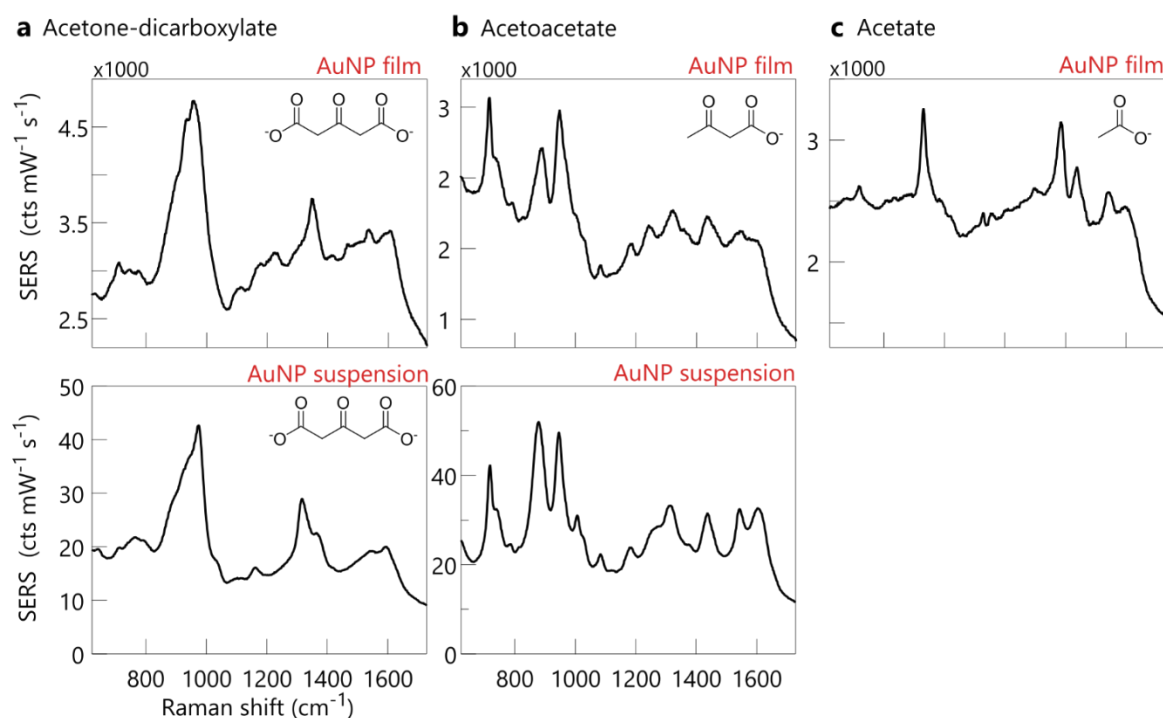

**Figure S8.** Spectra of decomposition products. (a) SERS spectra on AuNP film of the three most common citrate reaction by-products and their decomposition products.

Decomposition also carries on after the reaction whilst the freshly synthesised nanoparticle suspension cools down to room temperature (ca. 1h in our case).

The activation energy for the decomposition of ADC and AA are 23.9 kcal/mol=1.04 eV and 23.7 kcal/mol=1.03 eV. The rate constants at 25 °C for AA (acid) is  $k = 1.64 \times 10^{-3} \text{ min}^{-1}$  and for ADC (acid)  $k = 0.99 \times 10^{-3} \text{ min}^{-1}$ .<sup>1,2</sup> Tables S2 and S3 contain the calculated decomposition times for different temperatures confirming the rapid decomposition.

| acetone-dicarboxylic acid <sup>3</sup>           |                                              |                        |
|--------------------------------------------------|----------------------------------------------|------------------------|
| $E_a = 23.7 \text{ kcal/mole} = 1.03 \text{ eV}$ |                                              |                        |
| temperature (°C)                                 | decomposition rate $k$ ( $\text{min}^{-1}$ ) | t until 90% decomposed |
| 5                                                | $10.3 \times 10^{-5}$                        | 15 d                   |
| 18                                               | $0.70 \times 10^{-3}$                        | 54.6 h = 2.26 d        |
| 28                                               | $2.75 \times 10^{-3}$                        | 13.9 h                 |
| 100                                              | 5.93                                         | 0.39 min               |

**Table S2.** Acetone-dicarboxylic acid decomposition. Calculated decomposition rates (first order decomposition) and approximate time for 90% decomposition at different temperatures



| acetoacetic acid <sup>4</sup>                    |                                              |                        |
|--------------------------------------------------|----------------------------------------------|------------------------|
| $E_a = 23.7 \text{ kcal/mole} = 1.03 \text{ eV}$ |                                              |                        |
| temperature (Celsius)                            | decomposition rate $k$ ( $\text{min}^{-1}$ ) | t until 90% decomposed |
| 5                                                | $5.51 \times 10^{-5}$                        | 29 d                   |
| 18                                               | $0.38 \times 10^{-3}$                        | 101.8 h = 4.24 d       |
| 28                                               | $1.47 \times 10^{-3}$                        | 26 h                   |
| 100                                              | 3.18                                         | 0.72 min               |

**Table S3.** Acetoacetic acid decomposition. Calculated decomposition rates (first order decomposition) and approximate time for 90% decomposition at different temperatures

Based on their SERS spectra (Figure S8, a-c) on plasma-cleaned AuNP films (top) and after the addition of excess amounts to fresh aqueous AuNPs (bottom), it is evident that observed ageing process is not related to citrate decomposition products. This is further supported by swapping the supernatant of aged and fresh AuNPs.

**ADC AuNPs.** It is possible to synthesise gold nanoparticles by using disodium 1,3-acetone-dicarboxylate (ADC) instead of trisodium citrate as the reducing agent. By doing so, the SERS spectra of citrate decomposition products, e.g. acetoacetate, without the presence of citrate can be observed.

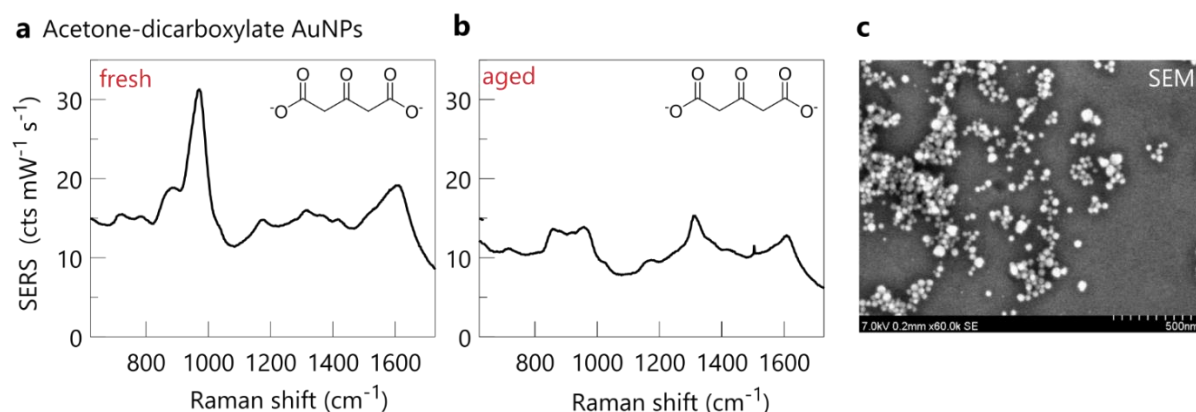

**Figure S9.** Disodium acetone-dicarboxylate AuNPs. (a) SERS spectrum of freshly-made NaCl-salted disodium acetone-dicarboxylate AuNPs. (b) SERS spectrum of aged NaCl-salted DAD AuNPs. (c) SEM of synthesised DAD AuNPs showing spherical particles with a “binary” size distribution.

The synthesis yields mostly spherical AuNPs with a binary size distribution (Figure S9c). the typical ageing response observed in citrate-reduced AuNPs is not seen even when the particles are aged (Figure S9a). This confirms again that thermal decomposition of citrate by-products is not responsible for ageing.

**Effect of  $\text{HAuCl}_4$  on AuNP size (at room temperature).** Through the addition of  $\text{HAuCl}_4$  to the AuNP suspension, etching of adatoms is observed. The presence of citrate also leads to a slight growth of the AuNPs. However, the reaction rate for growth is very low (it normally requires  $100^\circ\text{C}$ ). Therefore, the balance of these two is slow etching but only of adatoms off the facets. Zeta size measurements show that the hydrodynamic radius barely increases over 2h (likely not a significant variation) (Figure S10).

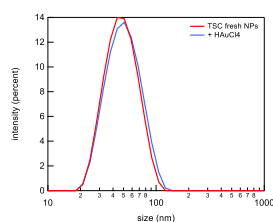

**Figure S10.** Etched AuNPs zeta size measurement. Slight size increase of AuNP suspension after (2h) the addition of  $\text{HAuCl}_4$

**Control experiment: Boiling of aged AuNPs without  $\text{HAuCl}_4$ .** Boiling aged AuNPs aggregates without addition of  $\text{HAuCl}_4$  (boiled after aggregation) increases and slightly broadens the adatom mode at  $1080\text{ cm}^{-1}$  (Figure S11a) This is indicative of adatoms being formed.

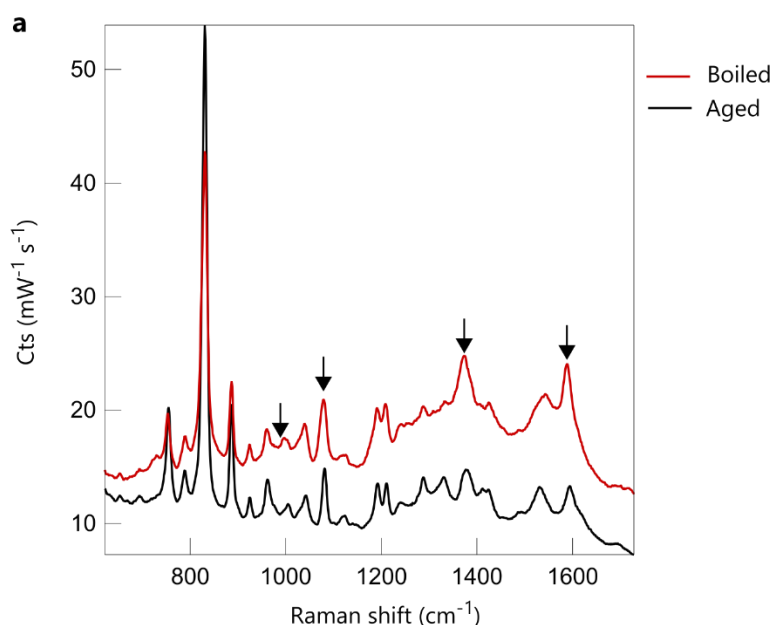

**Figure S11.** Boiling aged AuNP aggregates (a) Typical 'aged'  $\text{CB}[5]:\text{AuNP}$  spectrum (black) with adatom peak at  $1080\text{ cm}^{-1}$ . Boiling of the  $\text{CB}[5]:\text{AuNP}$  aggregates leads to an increase of the adatom mode.

**AuNP gap size.** A geometry optimisation for citrate in the gap-spanning configuration  $c_2-t_2t_2$  with increasing distance between the Au slabs is performed (Figure S12a). For an Au-Au centre distance of nearly  $\sim 1\text{ nm}$ , the  $c_2-t_2t_2$  mode transitions to the non-spanning  $t_2t_2$ . This calculation gives a good intuition about the maximum gap size for the gap-spanning mode. The calculation is also consistent with what is seen in SERS measurements for fully deprotonated citrate – coordination without the central carboxylate can occur.

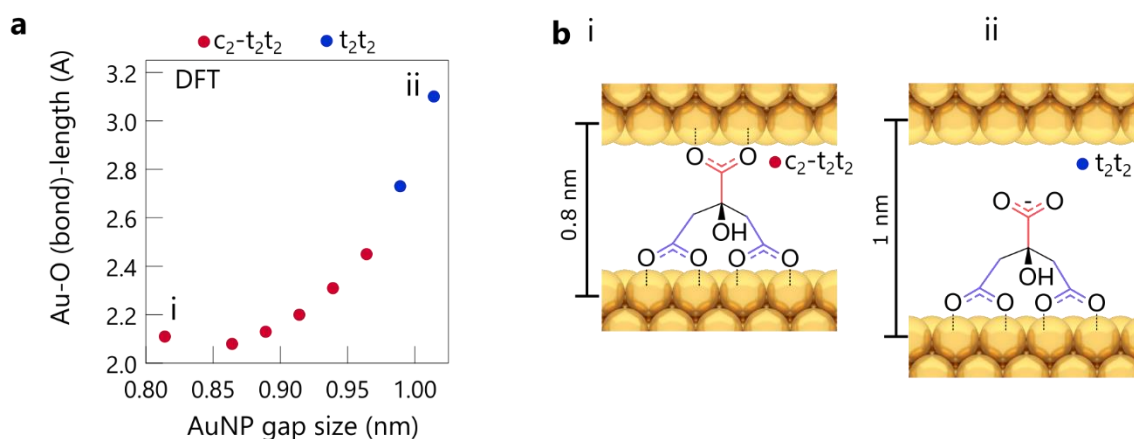

**Figure S12.** DFT gap size calculation. (a) Evolution of average COO-Au bond for gap size between ~0.8 nm and ~1 nm. At around 1 nm gap distance, the  $c_2-t_2t_2$  coordination transitions into  $t_2t_2$ .

**Surface chlorides and monodentate citrate binding.** To prove that surface chlorides are preventing citrate from bidentate binding, AuNP aggregates are formed with a range of mono and divalent salts of which three ( $MgCl_2$ ,  $CaCl_2$ ,  $NaCl$ ) are chlorides.

Consistent with our hypothesis, all three chloride-salted AuNP aggregates (Figure S13a) show the strong C-O stretch at ~1300-1320  $cm^{-1}$  (monodentate, labelled Mono) as a result of only one carboxylate oxygen coordinated to the Au surface. Simultaneously, the decreasing intensity of the symmetric carboxylate stretch at ~1380  $cm^{-1}$  (Bi) shows that bidentate binding is reduced. The dominant mode of the chloride-salted aggregates is clearly the gap-spanning mode  $c_2-t_2t_2$  with the strong 995  $cm^{-1}$  and weak 1020  $cm^{-1}$  vibration.

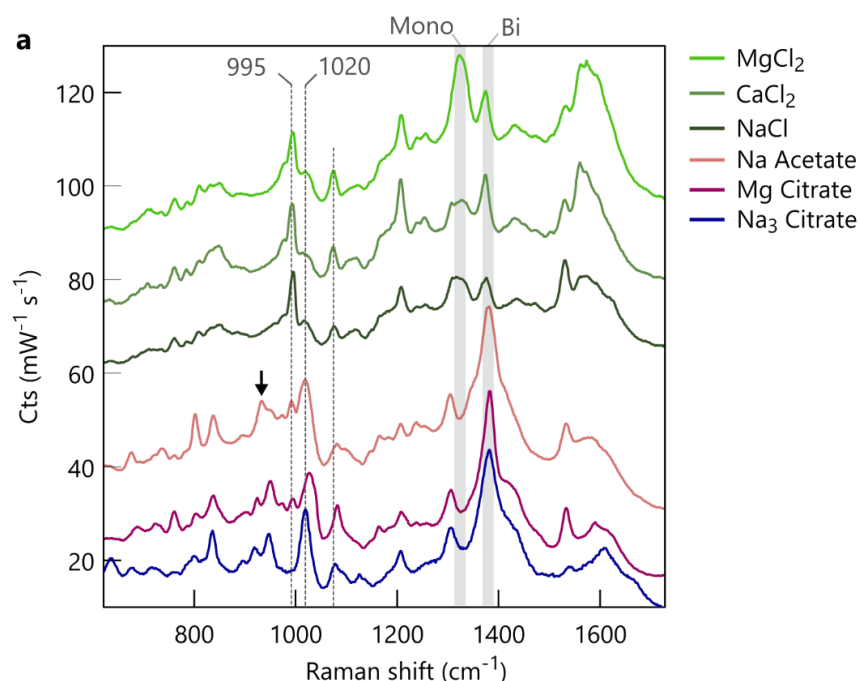

**Figure S13.** Chlorides in salted AuNPs. (a) Aggregation of slightly aged AuNPs with different salts. The green spectra, which all contain chloride ions, show clear evidence of monodentate

binding. Aggregation by using magnesium citrate or sodium acetate, show regular bidentate binding.

Control measurements with two citrate salts (magnesium citrate and trisodium citrate) show typical citrate signals with strong  $c_2$  and some  $c_2$ - $t_2t_2$  coordination (only for Mg citrate), but no evidence of monodentate binding. The SERS spectrum for sodium acetate-salted aggregates show typical citrate signals as obtained for the citrate salts or the citrate signals on AuNP films. There is some acetate adsorbed on the Au surface (black arrow) as revealed by the characteristic  $\nu(C-C)$  of acetate at  $930\text{ cm}^{-1}$  (see Figure **S8c**). Despite acetate being adsorbed, there is no evidence of monodentate binding of the adsorbed citrate species.

**Identifying surface chlorides in AuNP nano-gaps.** The presence of adsorbed chlorides on the gold surface can be confirmed *via* low-wavenumber Au-Cl vibrations. Upon addition of chloride salts ( $\text{MgCl}_2$ ,  $\text{CaCl}_2$ ,  $\text{KCl}$ ,  $\text{NaCl}$ ) and also  $\text{HCl}$  to freshly aggregated AuNPs (salted with 60 mM TSC), peaks at  $\sim 170$  and  $\sim 240\text{ cm}^{-1}$  emerge (Figure **S14**). Both peak positions are characteristic Au-Cl vibrations which have been studied in the past.<sup>5,6</sup>

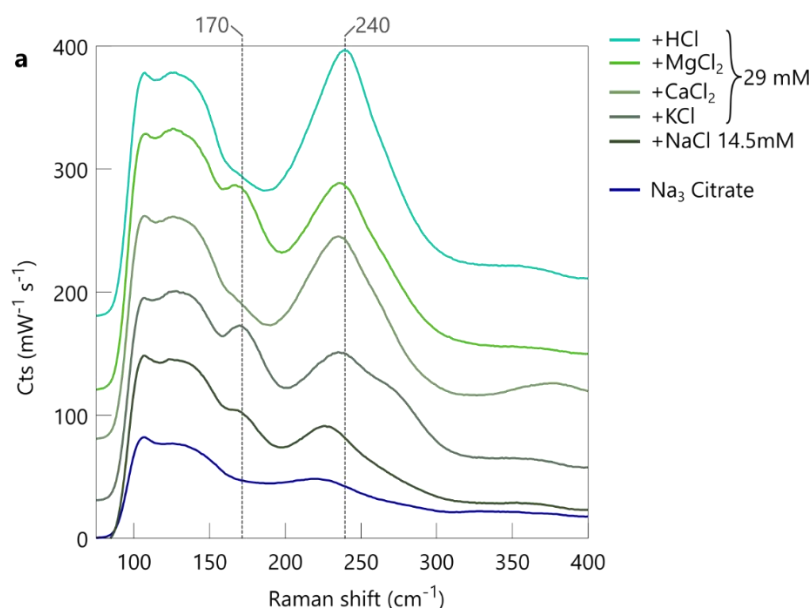

**Figure S14.** Trisodium citrate-salted AuNPs and chlorides. (a) AuNP aggregates formed by “salting” with TSC. After aggregation, chloride salts/ $\text{HCl}$  are added and low-wavenumber SERS is recorded. Background of spectra is shifted; no scaling is performed.

**SEM close-ups of AuNP films.** For the investigation of citrate binding in an environment free from citrate by-products, AuNP films are used (see methods section of main text for details). These AuNP films consist of one to three layers of close-packed 80 nm AuNPs as evident from the SEM images (Figure **S15, a-d**). A close-up image of the films prior to plasma treatment (Figure **S15c**, red arrows) clearly shows signs of electron irradiation damage (“halo-effect”) of organic compounds deposited locally onto the AuNP surface. The  $\text{O}_2$  plasma cleaned AuNPs with all organics removed do not exhibit this effect (Figure **S15d**). In general, it can be stated that oxygen plasma etching used here preserves the shape of the nanoparticles and their facets.

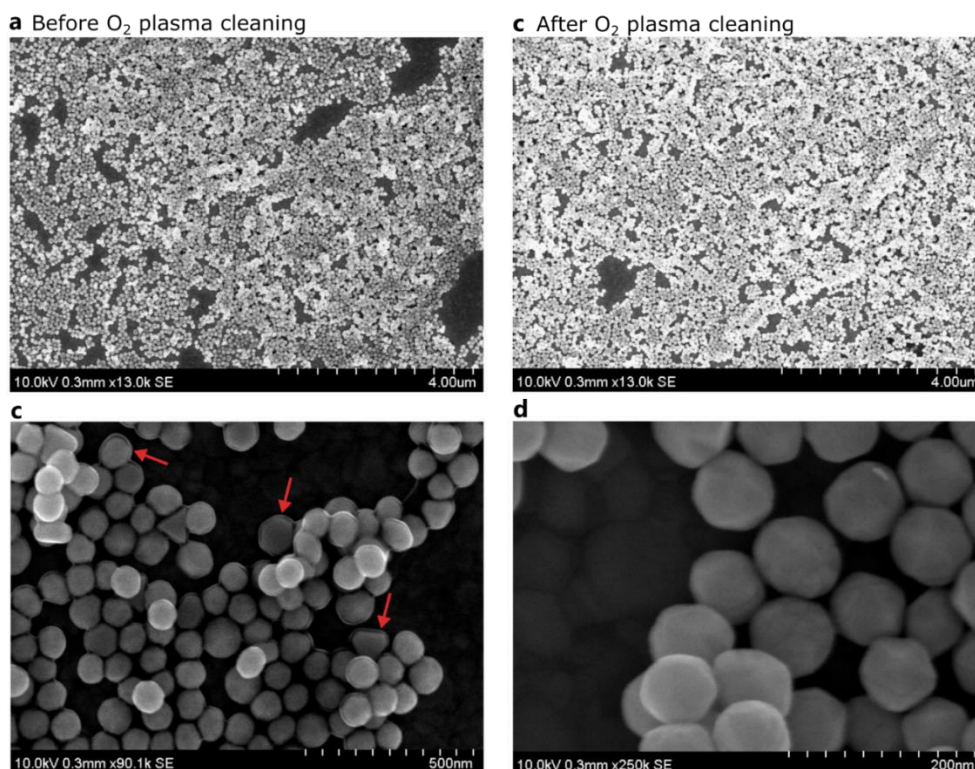

**Figure S15.** SEM images of AuNP films. (a,c) Films before O<sub>2</sub> plasma etching, while (b,d) show the films after 30 min O<sub>2</sub> plasma treatment. Red arrows indicate electron irradiation induced deposition of organic compounds on the AuNP surface.

**Surface chlorides and monodentate citrate binding in AuNP films.** Adding sodium chloride to TSC AuNP films leads to an increase in monodentate binding of citrate. Exactly the same effect is observed in colloidal gold clusters aggregated with NaCl (Figure S16a). The intensity of the symmetric carboxylate stretch at  $\sim 1380\text{ cm}^{-1}$  decreases whilst a peak at  $\sim 1300\text{ cm}^{-1}$  (C-O-Au stretch) emerges. Also clearly visible (black arrow) is the presence of the C=O mode of the monodentate carboxylate.

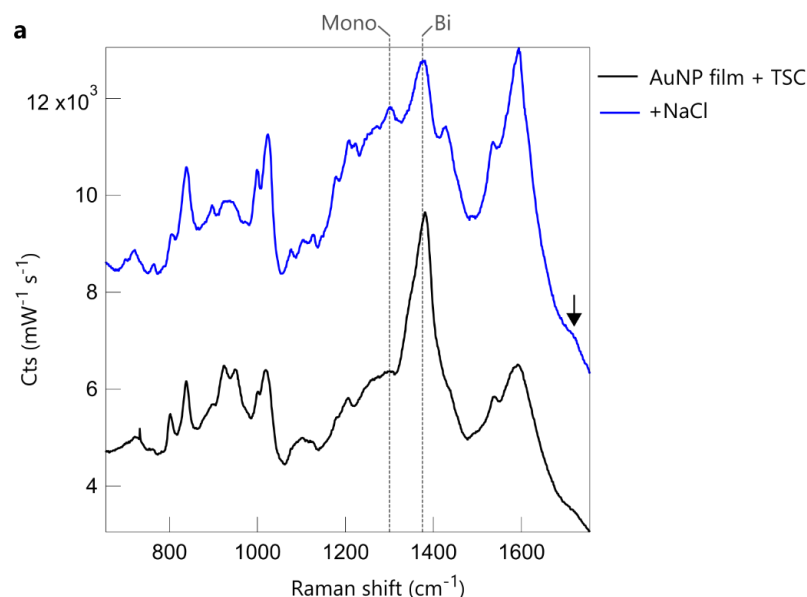

**Figure S16.** AuNP films with TSC and added NaCl. (a) Upon addition of NaCl (top) to a TSC sample (bottom), monodentate binding is detected.

**Citrate-AuNP films ageing.** To investigate the ageing behaviour of these AuNP films, a sample is kept in a citric acid solution (100 mM pH=3.5) for 87 days. The SERS spectra (Figure S17, a-c) show the expected  $c_2$  coordination mode for fresh films characterised by a strong  $1020\text{ cm}^{-1}$  vibration (red arrow). With increasing age, citrate starts to span the gaps with the modes  $c_2-t_2t_2$  and  $c_2-t_2$  as indicated by the  $995$  (dark blue) and  $975\text{ cm}^{-1}$  (light blue) peaks. Binding of the terminal carboxylates is further confirmed by the  $\text{COO}^-$ -Au stretches at  $\sim 1530$  which develop over time. For the oldest sample (87 days), a peak at  $1050\text{ cm}^{-1}$  (black arrow) suggests the presence of uncoordinated central carboxylates. This means that also  $t_2$  modes are present. As discussed in the main text, the lack of the  $1080\text{ cm}^{-1}$  vibrations suggests that the underlying ageing pathway of AuNP films is different to the colloidal case.

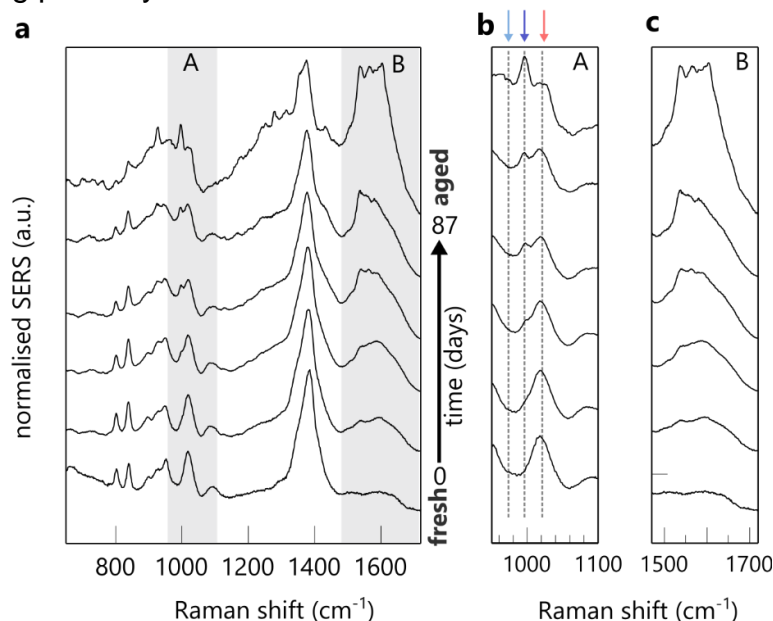

**Figure S17.** Ageing of AuNP films. (a) Ageing spectra, with (b) CC-stretches, (c) asymmetric  $\text{COO}^-$ -Au stretches. Arrows: Light-blue marks  $785\text{ cm}^{-1}$  vibration, dark blue  $995\text{ cm}^{-1}$  and red  $1020\text{ cm}^{-1}$ .

## References

- (1) Yasuda, M. Dissociation Constants of Some Carboxylic Acids in Mixed Aqueous Solvents. *Bull. Chem. Soc. Jpn.* **1959**, *32*, 429–432.
- (2) Doyen, M.; Bartik, K.; Bruylants, G. Journal of Colloid and Interface Science UV – Vis and NMR Study of the Formation of Gold Nanoparticles by Citrate Reduction : Observation of Gold – Citrate Aggregates. *J. Colloid Interface Sci.* **2013**, *399*, 1–5.
- (3) Larson, D. W.; Lister, M. W. Catalytic Decomposition of Acetonedicarboxylic Acid. *Can. J. Chem.* **1968**, *46*, 823–832.
- (4) Hay, B. R. W.; Bond, M. A. Kinetics of the Decarboxylation of Acetoacetic Acid. *Aust. J. Chem.* **1967**, *20*, 1823–1828.
- (5) Gao, P.; Weaver, M. J. Metal-Adsorbate Vibrational Frequencies as a Probe of Surface Bonding: Halides and Pseudohalides at Gold Electrodes. *J. Phys. Chem.* **1986**, *90*, 4057–4063.
- (6) Chan, M. Y.; Leng, W.; Vikesland, P. J. Surface-Enhanced Raman Spectroscopy Characterization of Salt-Induced Aggregation of Gold Nanoparticles. *ChemPhysChem* **2018**, *19*, 24–28.
